# Supplementary material
Source: publisher site journal article supplement (https://www.spandidos-publications.com/4186/downloadSupplementary)

Figure S1. circ\_0001666 and miR-1229 mRNA expression levels in the colorectal cancer cell lines and normal control. (A) circ\_0001666 and (B) miR-1229 mRNA expression levels in different cell lines. \* $P < 0.05$ , \*\* $P < 0.01$ , \*\*\* $P < 0.001$  vs. HIEC. circ, circular RNA; miR, microRNA.

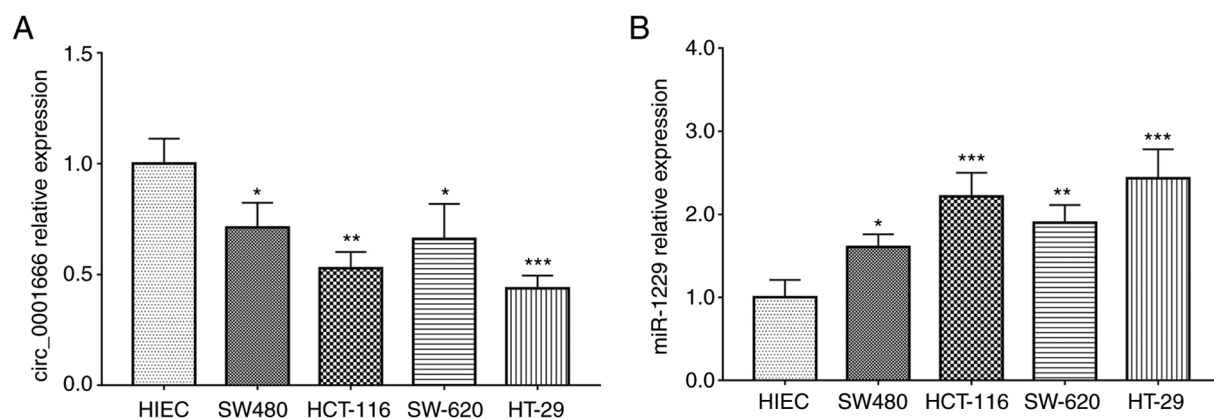

Figure S2. Subcellular location of circ\_0001666 expression.  
circ, circular RNA.

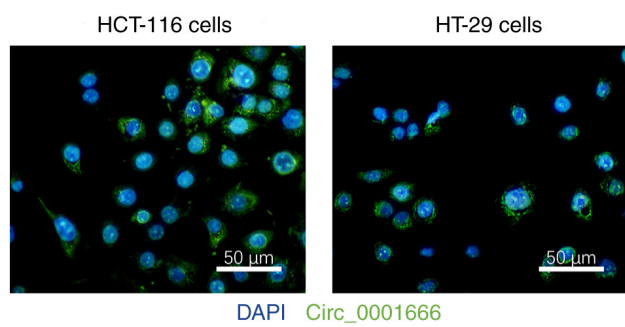

Figure S3. Forward-side scatter cryptogram of CD133<sup>+</sup> cells. Gating strategy used in forward-side scatter cryptogram in (A) HT-29, (B) HCT-116 cells and (C) rescue experiment. miR, microRNA; circ, circular RNA; NC, negative control.

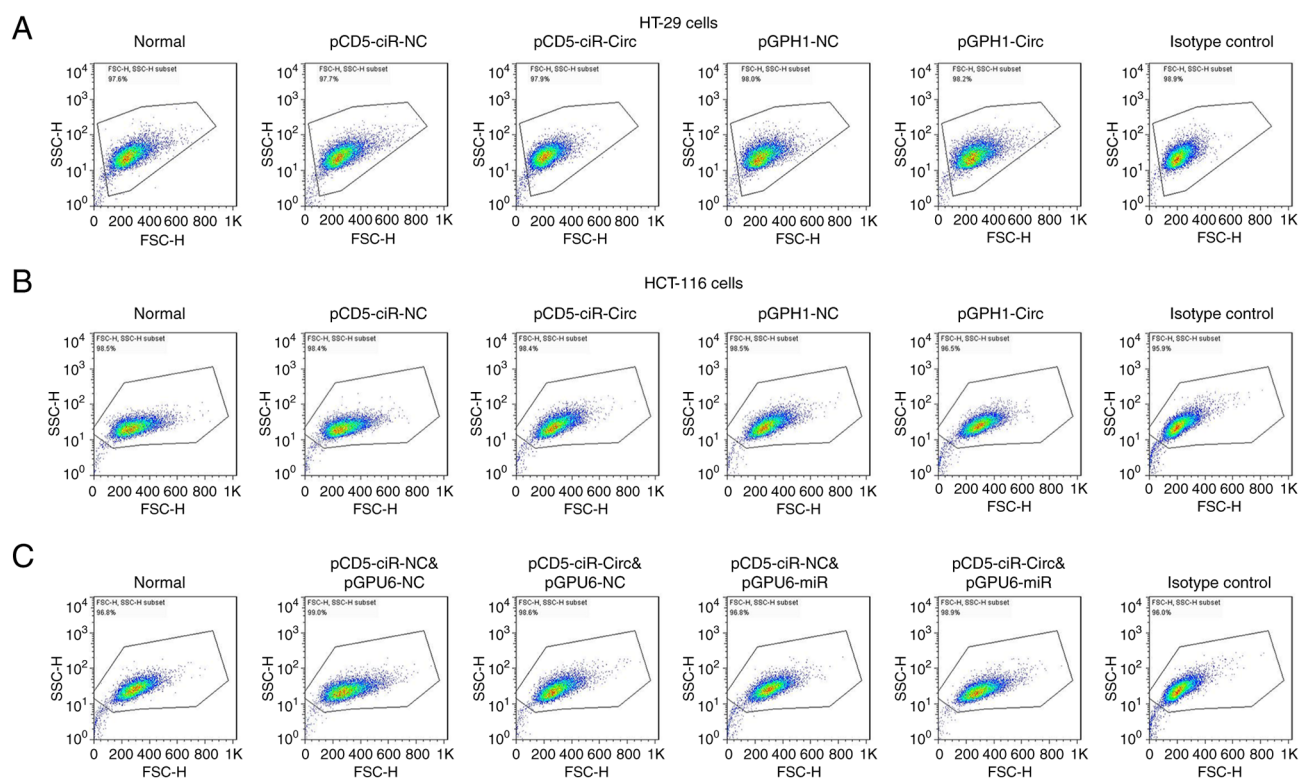

Figure S4. Transfection efficacy of miR-1229 overexpression and knockdown plasmids. miR-1229 expression in the (A) HT-29 and (B) HCT-16 cell lines following transfection with miR-1229 overexpression and knockdown plasmids. \*\*P<0.01, \*\*\*P<0.001. miR, microRNA; NC, negative control; pGPH1-miR, miR-1229 knockdown plasmids, pGPH1-NC, knockdown NC plasmids; pGPU6-miR, miR-1229 overexpression plasmids; pGPU6-NC, overexpression NC plasmids.

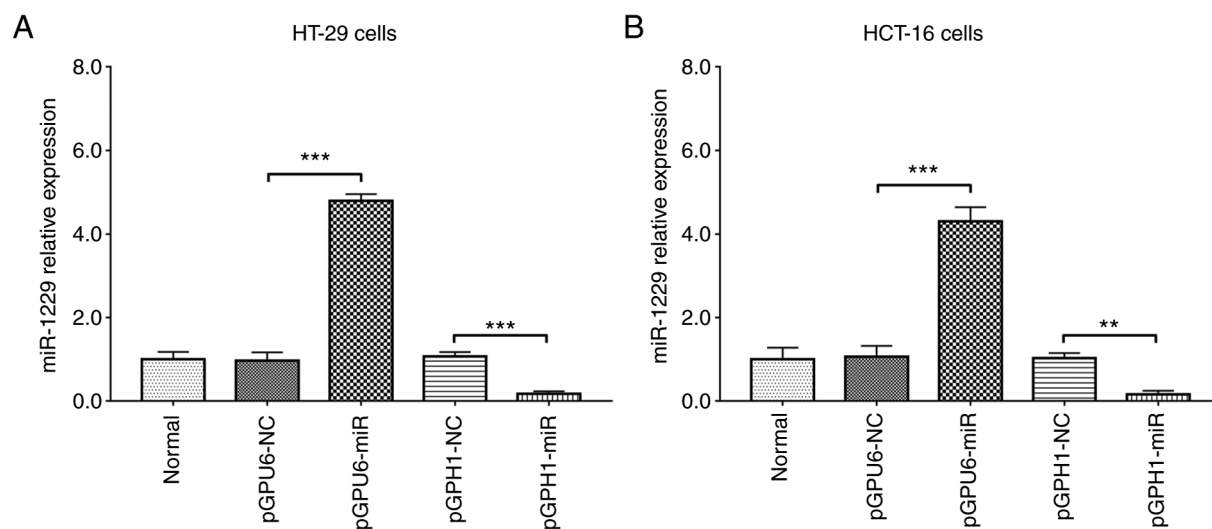

Figure S5. Circular RNA 0001666 and microRNA-1229 binding. miR, microRNA; circ, circular RNA.

HT-29 cells

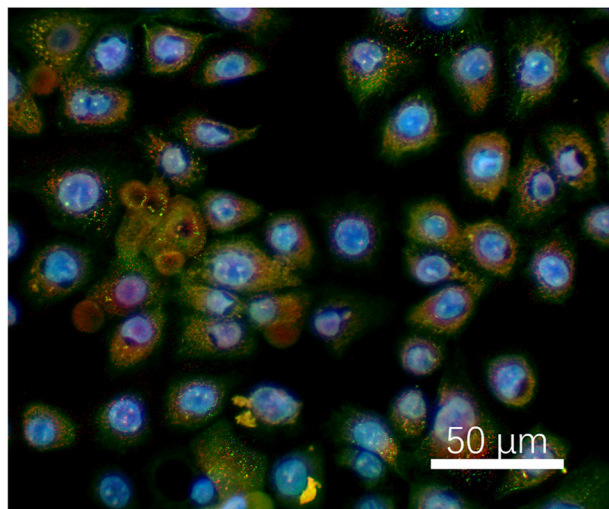

DAPI

Circ\_0001666

miR-1299

Figure S6. CXCR5 mRNA and protein expression level in rescue experiments. CXCR5 (A) mRNA and (B and C) CXCR5 protein expression levels in rescue experiments. \*P<0.05, \*\*\*P<0.001. C-X-C motif chemokine receptor 5; miR, microRNA; circ, circular RNA; NC, negative control. pCD5-ciR-Circ, circ\_0001666 overexpression plasmid; pCD5-ciR-NC, overexpression NC plasmid; pGPU6-miR, miR-1229 overexpression plasmid; pGPU6-NC, overexpression NC plasmid.

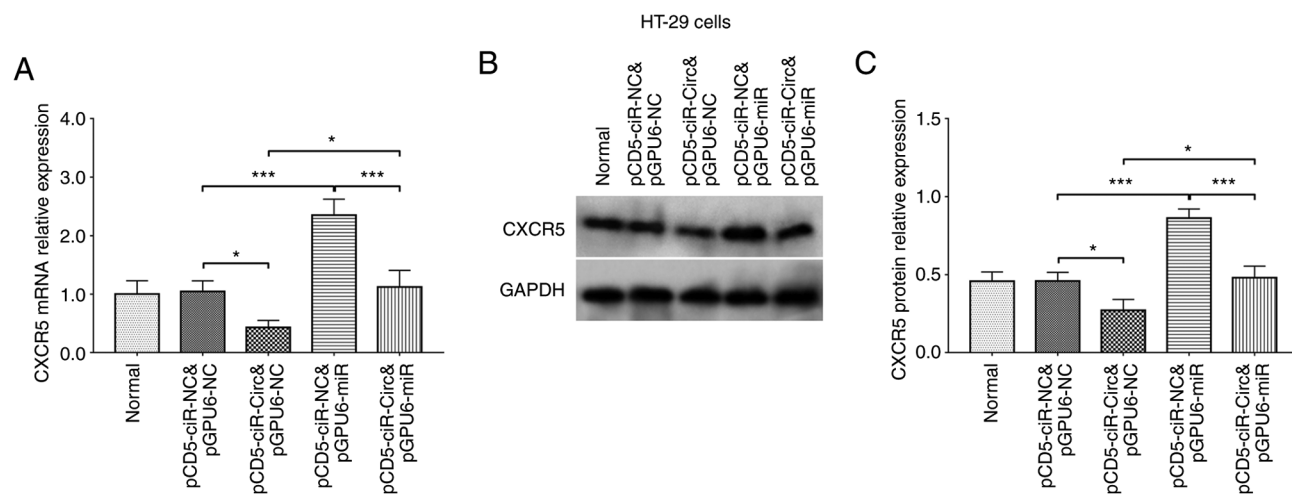

Supplement: Supplementary file 1 [file downloadSupplementary]
